# Supplementary material for: High expression of PKM2 synergizes with PD-L1 in tumor cells and immune cells to predict worse survival in human lung adenocarcinoma
Source: PubMed Central journal article supplement (PMC7255362; doi:10.7150/jca.42610), 2020-05-18
Supplement: jcav11p4442s1.pdf [file jcav11p4442s1.pdf]

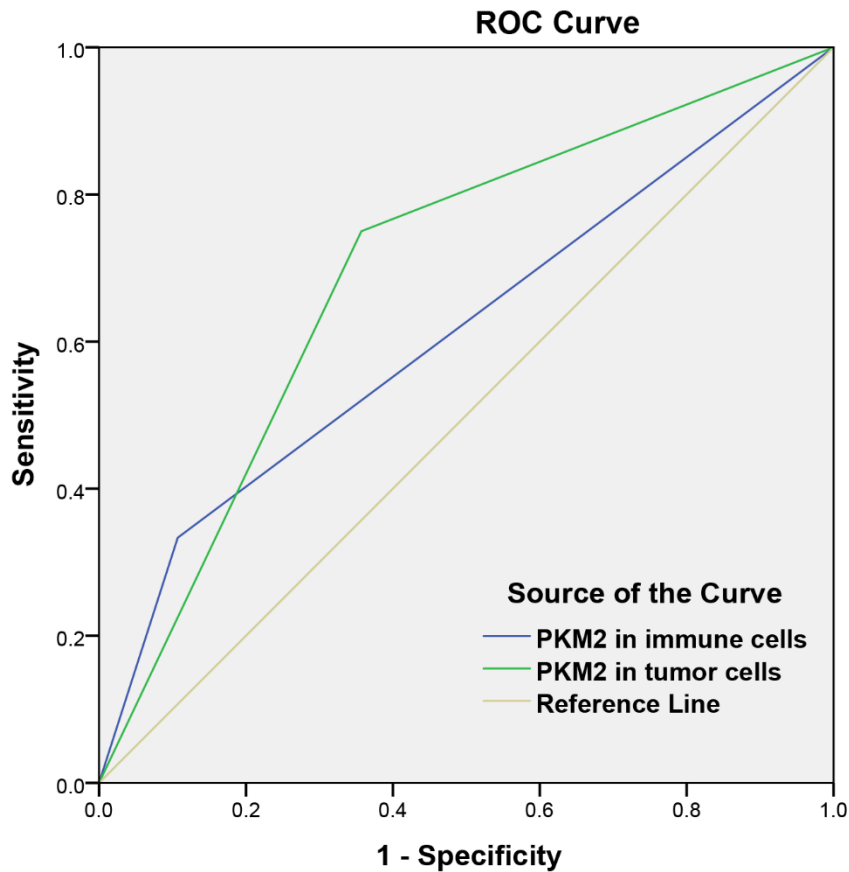

**Figure S1. ROC analysis of PKM2 protein by overall survival in lung AC patients.**

The cut-offs of PKM2 in tumor cells ( $\geq 9.5$  = high expression;  $< 9.5$  = low expression) and immune cells ( $\geq 8.5$  = high expression;  $< 8.5$  = low expression) have optimal sensitivity and specificity. PKM2 expression level in tumor cells (area under the curve was 0.696, 95% CI: 0.563-0.829;  $P = 0.007$ ). PKM2 expression level in immune cells (area under the curve was 0.613, 95% CI: 0.475-0.751;  $P = 0.123$ ).
